# Supplementary material for: Tilsotolimod with Ipilimumab Drives Tumor Responses in Anti–PD-1 Refractory Melanoma
Source: Oxford University Press journal article supplement (doi:10.1158/2159-8290.cd-20-1546), 2021-03-11
Supplement: cd-20-1546_table_s5_suppst5.xlsx [file cd-20-1546_table_s5_suppst5.xlsx]

## Sheet: CD-20-1546R1_Table_S5
Table S5. Baseline gene expression in local and distant lesions
	mRNA - normalized log2 count data
Raw ID	Patient ID	Site
				C4BPA-mRNA	C7-mRNA	CASP10-mRNA	PBK-mRNA	CCL25-mRNA	CD1D-mRNA	TFRC-mRNA	FPR2-mRNA	CD24-mRNA	TNFRSF14-mRNA	DDX43-mRNA	IL13RA2-mRNA	IL7R-mRNA	IL1A-mRNA	IL5-mRNA	GAGE1-mRNA	IKBKE-mRNA	ETS1-mRNA	INPP5D-mRNA	CD53-mRNA	CD9-mRNA	TICAM2-mRNA	FCER1A-mRNA	PIN1-mRNA	C4B-mRNA	TNFRSF18-mRNA	KIR3DL1-mRNA	ITGB1-mRNA	CTSG-mRNA	IL17F-mRNA	LTB-mRNA	SPP1-mRNA	LGALS3-mRNA	GZMB-mRNA	CCL28-mRNA	CARD11-mRNA	ATM-mRNA	ELK1-mRNA	RORA-mRNA	IRAK4-mRNA	CXCL16-mRNA	SPN-mRNA	CXCR4-mRNA	PRF1-mRNA	JAK1-mRNA	CCL26-mRNA
I2A Pre dose	2	local		2.34141	6.77437	5.20931	9.36156	1.82684	5.66334	10.0923	6.3858	4.34141	9.24228	4.01948	10.1533	11.885	3.47891	2.47891	3.01948	7.60444	12.488	9.08153	11.369	10.7773	9.16031	4.87746	8.50732	6.57407	5.22893	3.77437	13.5081	3.54304	3.10694	7.28158	12.7248	12.7264	9.52231	2.82684	6.5033	3.60444	8.14876	7.58553	7.63051	8.57215	6.25789	9.99102	9.33463	10.3599	5.26741
I3A Pre	3	local		3.36154	5.0985	6.77658	5.23601	2.77658	6.63456	10.9933	7.70731	7.23601	12.0917	5.9465	6.30014	8.47701	5.77658	5.36154	4.77658	9.29228	11.3728	10.4701	12.8955	12.5121	8.449	6.0245	9.0985	8.42043	7.58393	4.0985	13.0298	5.0985	4.9465	9.42763	16.2836	14.2762	9.93645	5.23601	9.08946	6.23601	7.92632	8.51804	7.65922	11.6774	8.83186	12.5522	10.7624	11.0781	4.9465
I3B Pre	3	distant		2.50393	9.81764	4.21442	8.71692	3.13196	6.39322	11.3924	6.63695	8.31596	11.4416	5.17378	6.20437	10.9431	3.43681	2.74494	6.47912	8.5182	12.0153	10.1789	11.7667	10.5379	6.62946	5.0445	9.12531	8.50393	5.62946	3.62946	12.4108	4.79938	3.29242	10.2763	13.0711	12.8662	10.4597	2.36642	8.39101	5.21442	7.18405	8.49571	7.85507	8.12931	9.59909	11.9797	9.81681	10.6947	4.0445
I4A Pre	4	local		3.32062	9.18813	5.45307	9.31888	3.20514	5.40154	11.6103	7.23489	6.30668	8.46253	4.32062	9.82841	8.2568	4.90558	3.07961	4.0125	7.40808	10.7826	8.30317	10.6251	11.8511	7.36837	5.81	9.02106	7.21264	6.44036	4.26403	13.1727	6.59746	3.70764	6.515	16.0114	11.4028	9.51802	4.37507	5.42753	4.94211	7.93759	7.36837	7.80009	9.46096	4.7901	9.97333	9.50129	10.2431	4.20514
I4B Pre	4	distant		3.46659	11.1235	6.51495	8.83688	4.32909	7.07325	10.6501	7.62921	5.62187	10.6246	5.09462	0.00716032	8.7587	4.17709	3.81452	3.91405	9.31322	11.8982	10.3647	12.684	10.3746	8.39948	4.46659	9.60707	8.21661	7.21661	4.32909	12.3178	4.53072	4.00716	8.56558	15.1088	12.5521	11.5742	3.81452	7.56175	5.53072	8.13128	7.82734	8.02953	9.52286	7.60707	11.2989	11.6712	10.7145	5.05155
I6B Baseline	6	distant		2.39118	7.1191	4.31718	8.4224	2.87661	4.35466	10.2818	4.06926	7.00589	12.4046	3.87661	4.35466	7.9519	2.65422	1.87661	3.39118	7.22913	11.4752	8.25908	10.4519	9.61325	7.23918	3.87661	8.94731	8.28842	5.66917	3.46157	13.6825	3.65422	2.7697	8.22407	14.9866	11.03	8.54093	3.15672	6.84404	3.87661	7.32664	7.48288	7.0408	7.72747	5.40911	10.7496	8.86042	9.6055	2.7697
2bpre	2	distant		3.31701	7.00151	5.09462	8.8672	3.31701	4.90197	10.406	5.71911	8.85838	8.94428	4.59712	4.41654	9.54032	3.67958	2.83158	2.83158	7.56494	11.9206	8.54308	10.5082	10.9474	9.46385	6.73847	9.14265	7.35514	6.00151	3.31701	13.7936	5.63894	3.09462	7.6492	10.8111	13.1133	8.34254	3.31701	7.12436	3.67958	8.31701	8.0719	7.6492	8.70932	6.06424	9.65176	8.02535	10.6312	4.31701
i6a baseline	6	local		2.45407	4.51296	4.45407	8.3848	3.19103	3.95657	11.1933	4.32853	7.35292	13.3646	3.77599	3.03903	5.48381	1.8691	3.03903	3.19103	6.72708	11.1376	7.22665	9.28906	9.67646	6.81162	4.11703	8.93519	7.58335	5.56954	4.26142	13.0535	3.67646	3.8691	6.54153	14.9694	10.5389	7.45407	3.03903	5.45407	3.19103	7.67646	7.40826	6.78797	7.26998	4.39266	10.7722	7.68928	9.64224	3.45407
I8A pretex (Baseline A)	8	local		3.89442	10.6205	5.23545	8.64574	4.30945	6.41379	10.7457	6.03192	6.60224	11.2862	4.57249	5.07499	9.49532	4.07499	3.15745	3.98753	8.53442	12.0472	9.17488	11.5412	10.1039	7.70177	6.03192	8.97337	8.11681	7.08556	5.19698	13.2078	5.60224	4.98753	9.69143	16.8981	11.8823	10.1625	5.11681	7.62415	5.03192	8.24491	8.04822	9.10387	8.62052	7.04281	11.572	10.1347	10.516	4.51109
I8B pretex (Baseline B)	8	distant		4.37761	9.20416	3.96258	9.1946	4.2845	6.54754	11.097	5.1325	7.92451	11.5172	5.42201	3.83704	9.30835	3.96258	3.18497	3.83704	7.96258	12.2572	8.72634	11.4457	11.7965	7.3663	5.62554	9.40828	7.3434	6.99232	4.96258	13.0897	4.90118	6.05004	10.1106	17.7836	12.866	10.3245	5.37761	7.76993	5.33181	8.53748	8.20416	9.11232	8.17851	6.37761	12.1304	8.98864	10.3098	4.07805
I10B Pretx	10	distant		2.55783	4.97287	5.83085	7.99523	3.67331	5.92706	10.2755	5.70079	4.78022	11.2789	5.39913	10.4637	7.39913	3.14279	2.97287	2.78022	8.5503	11.9003	9.52169	11.7169	10.1503	8.10729	5.06033	8.82149	6.63108	5.72775	5.25827	12.4742	4.72775	3.67331	7.47271	11.5756	13.503	9.69567	4.4323	7.00629	5.39913	7.27665	7.76728	8.32601	9.14529	6.96155	11.0775	10.8517	10.3414	4.14279
I12A Pretx	12	local		3.48802	6.46784	5.12545	8.16359	4.12545	6.64002	10.7179	6.40556	6.62188	10.7381	5.36249	12.0855	7.91055	3.64002	3.3181	4.22499	7.90306	10.811	8.75689	11.4615	10.3125	8.76518	5.6035	9.03577	7.66683	5.93281	4.90306	12.9581	4.71041	5.36249	7.3181	15.9395	13.9686	9.21594	5.56602	5.99052	5.64002	8.27229	8.31245	8.31245	9.1573	6.20074	10.1303	9.15415	10.1573	4.12545
I10A pretx	10	local		2.70338	3.46892	5.16281	6.93604	2.84088	5.10937	9.11107	4.18881	5.44754	11.9848	5.2641	8.51074	6.90502	3.28834	2.96642	4.84088	8.4978	10.5952	8.44485	10.5601	9.67492	6.86527	4.28834	9.12965	8.59334	6.25182	3.90502	12.5501	4.02531	4.51074	7.79931	14.2633	13.9674	7.2641	3.96642	7.22066	5.48998	7.75214	7.86527	8.18558	9.09054	6.05388	10.2891	8.33856	10.7998	3.84088
I12B pretx	12	distant		2.72237	5.82929	4.63664	8.88457	3.26986	5.30734	10.2495	4.57652	3.92882	12.6444	3.77682	8.22161	6.19186	2.72237	3.02193	5.48136	6.79012	11.8686	7.36178	9.46591	11.2262	7.64398	5.98772	8.9122	6.96445	3.66579	3.5455	11.9938	3.92882	4.15122	5.5455	14.3111	13.6545	6.86742	3.77682	4.92882	4.6069	8.08802	8.23139	8.82606	8.29806	3.82929	8.65311	6.78348	10.2562	3.26986
I15A pretx	15	local		2.80632	7.51861	4.64283	9.08776	2.16889	4.42523	15.4243	5.6714	5.56883	11.2002	3.90586	3.3209	8.34327	3.39129	2.90586	2.3209	7.66431	10.7852	7.95317	10.4367	12.4461	7.36091	4.04336	9.73622	7.42523	5.91783	3.90586	12.1427	3.39129	3.52253	6.81275	13.2486	14.425	9.65271	3.4584	6.55356	4.64283	8.24452	7.4543	7.95897	8.70114	8.87702	10.3516	8.92675	10.1481	3.69941
I15B pretx	15	distant		4.02308	13.3273	6.09347	7.12742	2.70115	7.91061	9.19301	6.83044	9.82527	11.3981	5.28611	4.50851	11.6495	3.70115	4.28611	4.28611	9.78862	12.4333	10.6927	12.9674	9.89098	7.78862	7.22471	9.53404	10.5838	8.17689	5.28611	12.418	7.70115	4.70115	13.0751	10.3912	11.9597	11.5419	5.02308	10.7012	6.22471	7.98655	8.16058	8.83044	8.45604	8.92032	12.6648	10.1399	11.3841	5.28611
I16A pretx	16	local		2.06172	10.476	4.23164	10.4555	3.79868	6.27117	11.6379	4.68621	6.92797	11.4515	4.38364	11.3915	9.95147	3.28411	2.93619	5.14918	7.53745	12.0528	8.77137	11.0227	11.384	8.49077	6.00032	9.2825	8.3655	6.83431	4.33474	13.0571	4.33474	3.56422	9.82216	14.0944	14.4356	8.30964	3.79868	7.65666	4.28411	8.06921	7.37157	8.18411	7.78509	6.55357	11.2857	8.50742	10.2325	4.79868
0020 A baseline	20	local		2.72943	4.76185	4.31439	8.84364	2.72943	4.07735	12.4516	5.33609	4.66232	12.0703	3.35746	4.02489	5.83985	2.72943	2.27	4.76185	6.83985	12.1112	6.75381	9.07574	11.1461	8.66017	4.47945	9.49038	6.36803	5.10289	3.59193	13.5025	2.72943	4.07735	6.28123	12.7726	14.8419	5.64504	3.27	5.10289	4.59193	8.14958	6.63632	8.93711	7.99792	4.47945	9.78373	6.62755	9.78175	3.85496
0020 B baseline	20	distant		3.28825	7.85928	4.67528	9.06152	3.17278	5.39517	10.9607	7.78749	4.98013	11.953	3.58781	3.75774	6.5765	2.90974	2.58781	3.58781	7.95413	11.9412	6.86394	9.94976	11.2822	8.49169	4.44579	9.62947	5.83574	5.17278	3.75774	12.9504	3.67528	3.90974	5.98013	14.4466	15.0451	7.34936	3.58781	5.07967	4.75774	8.28825	6.47046	9.00567	8.00988	4.17278	9.16901	6.68584	9.48717	3.4947
0023 A baseline	23	local		1.6752	8.62006	4.39767	8.90209	4.26016	6.7879	10.8209	5.39767	7.25414	11.8439	3.26016	11.4146	9.69979	2.6752	2.6752	4.56273	9.10983	12.4548	9.20346	11.6404	8.54062	7.54803	3.93823	9.26766	7.77112	8.01148	3.5232	12.3631	3.05371	4.10816	9.83103	14.1205	11.5848	9.87683	3.93823	7.93823	5.08119	7.97166	7.88465	8.82698	8.46441	7.14117	11.8295	9.74237	10.6803	4.16063
0023 B baseline	23	distant		2.95151	9.0931	5.21454	9.6211	4.95151	6.7381	9.77678	5.38447	8.03046	11.7939	4.21454	11.3257	10.0537	2.62958	3.43693	3.95151	8.70104	12.9978	9.30906	11.2042	8.47507	7.5244	6.91498	9.37104	7.07252	7.68486	2.95151	12.4305	5.15314	3.43693	10.4175	11.9921	10.6561	10.3473	2.95151	8.19943	5.62958	7.87751	7.83903	8.96497	8.20701	7.07252	12.1314	9.25893	10.6519	4.33002
0024 B baseline	24	distant		4.27593	12.662	5.86089	7.99334	3.74541	6.40838	10.3136	6.68401	6.64157	11.4459	4.82341	6.21934	9.69961	2.57549	1.57549	4.48238	8.98063	11.7404	9.3	11.2594	10.9385	8.05122	8.12238	8.36339	8.56984	7.34367	4.27593	13.5463	5.70477	2.16045	10.0593	9.26199	11.3577	9.85857	2.57549	8.01011	5.66295	7.70477	8.03492	8.97209	8.43347	6.98488	10.6294	9.1642	10.8222	4.74541
0025 A baseline	25	local		3.35548	5.94044	5.41437	8.59706	2.77052	6.05592	10.5657	7.0279	4.85798	10.4126	8.31741	4.67741	8.22584	3.67741	2.94044	5.19678	8.82036	11.9088	9.56168	11.9864	12.4042	8.82036	5.29408	8.61914	9.48819	7.0279	4.29408	13.9798	6.12807	4.57787	7.64703	14.7494	13.7596	12.2736	3.94044	7.70125	4.97997	8.08793	8.06053	8.28227	9.21966	7.48476	11.4474	11.9149	10.6262	4.41437
0025 B baseline	25	distant		4.22746	11.8179	4.93796	6.99685	4.57539	7.35299	10.0627	6.81243	10.1901	11.0325	6.38274	1.76803	11.7489	0.768032	3.76803	3.93796	9.69877	13.4515	10.7553	13.0925	9.97016	7.81243	8.13435	8.9872	9.81516	8.16891	3.57539	12.7255	7.07181	2.76803	12.0781	5.62601	11.7574	10.3245	3.08996	9.94794	6.22746	7.77926	9.21924	9.07637	8.32262	8.91778	12.9326	11.4589	11.4396	4.57539
29 site a bl	29	local		14.7956	11.6149	5.955	4.18946	4.18946	8.73172	10.262	5.62242	8.2938	11.1166	5.86753	8.30216	7.955	5.18946	4.45249	5.18946	7.97606	10.8304	9.25124	11.6283	10.9826	7.77442	7.22508	9.12963	15.3466	5.99682	4.56797	12.9629	4.67489	4.03746	8.56102	13.424	11.7115	8.8899	4.77442	7.64889	4.86753	8.85053	10.0045	7.82173	10.5186	7.37533	10.4221	9.39501	11.1633	4.03746
29 site b bl	29	distant		5.37808	9.44656	7.16235	4.53008	4.79311	6.66758	11.2361	6.96304	5.79311	11.7837	7.33743	4.53008	6.96304	8.11504	5.01551	5.37808	9.48428	10.4273	10.8192	13.7075	13.1068	8.76274	5.79311	9.21938	7.79311	6.96304	4.79311	13.1367	5.90859	6.11504	8.83751	17.2881	14.3868	9.52103	5.37808	8.79311	5.37808	8.11504	7.73171	8.23052	12.133	8.77801	13.4478	8.93607	10.9051	9.21938
33 site a bl	33	local		2.5847	6.4472	4.21274	10.0787	3.82571	5.55154	11.385	7.85319	4.16967	11.783	3.5847	8.34202	8.07656	4.61713	2.12527	1.12527	10.0307	10.2351	7.90006	11.7156	9.10541	7.94864	3.4472	9.17376	9.85998	5.86674	3.51759	13.3216	3.3732	3.98325	6.59288	14.8947	14.5127	10.7727	4.16967	6.59288	3.88016	7.61713	7.89676	7.64097	8.71399	6.04414	11.8444	10.2782	10.0344	3.71023
33 site b bl	33	distant		2.49944	6.4865	3.59897	10.5305	2.86201	4.33594	10.96	4.0844	3.59897	10.9064	3.01401	3.94001	3.94001	2.01401	2.86201	3.27705	9.24283	9.53443	5.69208	8.47016	7.10147	7.49298	2.86201	9.32871	7.72551	3.59897	3.39252	13.2835	2.27705	4.27705	4.33594	12.904	14.9674	6.68077	3.27705	4.39252	3.27705	8.18394	6.61095	7.65787	7.23124	3.27705	8.79537	7.19193	9.44195	3.69208
	mRNA - normalized linear count data
				C4BPA-mRNA	C7-mRNA	CASP10-mRNA	PBK-mRNA	CCL25-mRNA	CD1D-mRNA	TFRC-mRNA	FPR2-mRNA	CD24-mRNA	TNFRSF14-mRNA	DDX43-mRNA	IL13RA2-mRNA	IL7R-mRNA	IL1A-mRNA	IL5-mRNA	GAGE1-mRNA	IKBKE-mRNA	ETS1-mRNA	INPP5D-mRNA	CD53-mRNA	CD9-mRNA	TICAM2-mRNA	FCER1A-mRNA	PIN1-mRNA	C4B-mRNA	TNFRSF18-mRNA	KIR3DL1-mRNA	ITGB1-mRNA	CTSG-mRNA	IL17F-mRNA	LTB-mRNA	SPP1-mRNA	LGALS3-mRNA	GZMB-mRNA	CCL28-mRNA	CARD11-mRNA	ATM-mRNA	ELK1-mRNA	RORA-mRNA	IRAK4-mRNA	CXCL16-mRNA	SPN-mRNA	CXCR4-mRNA	PRF1-mRNA	JAK1-mRNA	CCL26-mRNA
I2A Pre dose	2	local		5.06797	109.468	36.9962	657.823	3.54758	50.6797	1091.64	83.6215	20.2719	605.623	16.2175	1138.77	3782.23	11.1495	5.57477	8.10876	194.61	5744.55	541.766	2644.97	1755.04	572.174	29.3942	363.88	95.2779	37.503	13.6835	11650.3	11.6563	8.61555	155.587	6769.29	6776.89	735.363	7.09516	90.7167	12.1631	283.806	192.076	198.158	380.605	76.5264	1017.65	645.66	1314.13	38.5166
I3A Pre	3	local		10.2784	34.2612	109.636	37.6873	6.85224	99.3575	2038.54	208.993	150.749	4364.88	61.6701	78.8007	356.316	54.8179	41.1134	27.409	626.98	2651.82	1418.41	7619.69	5841.53	349.464	65.0963	548.179	342.612	191.863	17.1306	8363.16	34.2612	30.8351	688.65	79773.8	19840.7	979.87	37.6873	544.753	75.3746	243.254	366.595	202.141	3275.37	455.674	6005.99	1737.04	2161.88	30.8351
I3B Pre	3	distant		5.67228	902.408	18.5638	420.78	8.76625	84.0529	2688.14	99.5227	318.679	2781.48	36.0963	73.7396	1968.8	10.8289	6.7036	89.2095	366.635	4139.73	1159.21	3484.33	1486.65	99.007	33.0023	558.462	363.026	49.5035	12.3759	5445.39	27.8457	9.79757	1240.17	8605.88	7466.27	1408.27	5.15662	335.696	37.1276	145.417	360.963	231.532	280.004	775.555	4038.66	901.892	1657.34	16.5012
I4A Pre	4	local		9.99093	583.316	43.8064	638.651	9.22239	42.2693	3126.39	150.632	79.1589	352.757	19.9819	909.174	305.876	29.9728	8.45386	16.1392	169.846	1761.48	315.867	1579.33	3694.34	165.235	56.1029	519.528	148.327	86.8442	19.2133	9233.92	96.8351	13.0651	91.4554	66056.9	2707.54	733.18	20.7504	43.0378	30.7413	245.162	165.235	222.874	704.745	27.6672	1005.24	724.726	1211.98	18.4448
I4B Pre	4	distant		11.0547	2231.05	91.4528	457.264	20.0995	134.667	1606.96	197.98	49.2438	1578.82	34.1692	1.00498	433.144	18.0896	14.0697	15.0746	636.149	3816.9	1318.53	6580.58	1327.57	337.672	22.1095	779.861	297.473	148.736	20.0995	5105.28	23.1144	16.0796	378.876	35334.9	6005.73	3049.1	14.0697	188.935	46.2289	280.388	227.124	261.294	735.642	194.965	2519.47	3261.15	1680.32	33.1642
I6B Baseline	6	distant		5.24588	139.016	19.9343	343.08	7.34423	20.4589	1244.85	16.7868	128.524	5422.14	14.6885	20.4589	247.605	6.29505	3.67211	10.4918	150.032	2846.94	306.359	1400.65	783.209	151.081	14.6885	493.637	312.654	50.885	11.0163	13147.2	12.5901	6.81964	299.015	32465.7	2091.01	372.457	8.91799	114.885	14.6885	160.524	178.884	131.671	211.933	42.4916	1721.7	464.785	779.013	6.81964
2bpre	2	distant		9.96595	128.134	34.169	466.976	9.96595	29.8979	1356.79	52.6772	464.129	492.603	24.203	21.3556	744.599	12.8134	7.11854	7.11854	189.353	3876.75	373.011	1456.45	1974.68	706.159	106.778	565.212	163.726	64.0668	9.96595	14200.1	49.8298	8.54224	200.743	1796.72	8861.15	324.605	9.96595	139.523	12.8134	318.91	269.081	200.743	418.57	66.9142	804.395	260.538	1586.01	19.9319
i6a baseline	6	local		5.47958	22.8316	21.9183	334.254	9.13263	15.5255	2341.61	20.0918	163.474	10547.3	13.6989	8.21937	44.7499	3.65305	8.21937	9.13263	105.939	2253.02	149.775	625.585	818.284	112.331	17.352	489.509	191.785	47.4897	19.1785	8501.57	12.7857	14.6122	93.1528	32079.3	1487.71	175.347	8.21937	43.8366	9.13263	204.571	169.867	110.505	154.341	21.0051	1748.9	206.397	799.105	10.9592
I8A pretex (Baseline A)	8	local		14.8709	1574.33	37.6729	400.522	19.8278	85.2596	1717.09	65.4318	97.1563	2497.31	23.7934	33.7073	721.733	16.8536	8.92252	15.8623	370.78	4232.25	577.981	2980.12	1100.44	208.192	65.4318	502.635	277.589	135.821	36.6815	9460.84	48.5782	31.7245	826.82	122133	3775.22	1146.05	34.6987	197.287	32.7159	303.366	264.701	550.222	393.582	131.855	3044.56	1124.24	1464.28	22.802
I8B pretex (Baseline B)	8	distant		20.7871	589.833	15.5903	585.935	19.4879	93.5417	2190.44	35.0782	242.949	2930.97	42.8733	14.2911	634.005	15.5903	9.09434	14.2911	249.445	4895.35	423.536	2789.36	3557.18	164.997	49.3692	679.477	162.399	127.321	31.1806	8717.57	29.8814	66.2587	1105.61	225637	7465.15	1282.3	41.5741	218.264	40.2749	371.569	294.916	553.455	289.72	83.1482	4483.51	507.984	1269.31	16.8895
I10B Pretx	10	distant		5.88821	31.4038	56.9194	255.156	12.7578	60.8448	1239.47	52.0125	27.4783	2484.82	42.1988	1412.19	168.795	8.83232	7.85095	6.86958	374.883	3822.43	735.045	3366.09	1136.42	275.765	33.3665	452.411	99.1182	52.9939	38.2734	5689.97	26.4969	12.7578	177.628	3052.06	11609.6	829.256	21.5901	128.559	42.1988	155.056	217.864	320.907	566.25	124.634	2160.97	1847.92	1297.37	17.6646
I12A Pretx	12	local		11.2202	88.5146	34.9072	286.738	17.4536	99.7348	1684.27	84.7746	98.4881	1707.96	41.1406	4345.94	240.61	12.4668	9.97348	18.7003	239.364	1796.47	432.6	2820	1271.62	435.093	48.6207	524.854	203.21	61.0876	29.9204	7957.59	26.1804	41.1406	159.576	62845.4	16031.1	594.669	47.374	63.5809	49.8674	309.178	317.905	317.905	570.982	73.5544	1120.77	569.735	1141.96	17.4536
I10A pretx	10	local		6.51327	11.0726	35.823	122.449	7.16459	34.5203	552.976	18.2371	43.6389	4053.21	38.4283	364.743	119.844	9.7699	7.81592	28.6584	361.486	1546.9	348.46	1509.78	817.415	116.587	19.5398	560.141	386.237	76.2052	14.9805	5997.42	16.2832	22.7964	222.754	19664.9	16018.1	153.713	15.6318	149.154	44.9415	215.589	233.175	291.143	545.16	66.4353	1251.2	323.709	1782.68	14.3292
I12B pretx	12	distant		6.59957	56.8579	24.8753	472.631	9.64553	39.5974	1217.37	23.86	15.2298	6402.6	13.7068	298.504	73.103	6.59957	8.12255	44.674	110.67	3739.42	164.482	707.17	2395.65	200.018	63.4574	481.769	124.884	12.6915	11.6762	4078.54	15.2298	17.7681	46.7047	20326.7	12895.1	116.762	13.7068	30.4596	24.3677	272.105	300.534	453.848	314.749	14.2145	402.574	110.162	1222.95	9.64553
I15A pretx	15	local		6.995	183.369	24.9822	544.111	4.49679	21.4847	43973.1	50.9636	47.4661	2352.82	14.9893	9.99286	324.768	10.4925	7.49465	4.99643	202.855	1764.74	247.823	1386.01	5580.01	164.383	16.4882	852.891	171.877	60.4568	14.9893	4521.77	10.4925	11.4918	112.42	9732.55	21997.3	804.925	10.9921	93.9329	24.9822	303.283	175.375	248.822	416.203	470.164	1306.57	486.652	1134.69	12.9907
I15B pretx	15	distant		16.258	10278.3	68.2837	139.819	6.50321	240.619	585.289	113.806	907.198	2698.83	39.0193	22.7612	3212.59	13.0064	19.5096	19.5096	884.437	5530.98	1655.07	8008.71	949.469	221.109	149.574	741.366	1534.76	289.393	39.0193	5472.45	208.103	26.0128	8629.76	1342.91	3983.22	2981.72	32.5161	1664.82	74.7869	253.625	286.141	455.225	351.173	484.489	6493.46	1128.31	2672.82	39.0193
I16A pretx	16	local		4.17483	1424.31	18.7867	1404.13	13.9161	77.2343	3186.79	25.7448	121.766	2800.61	20.8741	2686.5	990.13	9.74126	7.65385	35.486	185.78	4248.58	436.965	2080.46	2672.59	359.731	64.014	622.745	329.811	114.112	20.1783	8522.91	20.1783	11.8287	905.242	17491.8	22158.6	317.287	13.9161	201.783	19.4825	268.581	165.601	290.846	220.57	93.9336	2496.55	363.906	1203.05	27.8322
0020 A baseline	20	local		6.63193	27.1306	19.8958	459.412	6.63193	16.8813	5601.57	40.3945	25.3219	4300.51	10.2494	16.2784	57.2758	6.63193	4.82322	27.1306	114.552	4424.1	107.92	539.598	2266.31	404.548	22.3074	719.263	82.5977	34.3655	12.0581	11605.3	6.63193	16.8813	77.7745	6997.29	29366.2	50.0409	9.64645	34.3655	24.1161	283.967	99.479	490.16	255.631	22.3074	881.444	98.8761	880.238	14.4697
0020 B baseline	20	distant		9.76928	232.208	25.5504	534.305	9.0178	42.0831	1992.93	220.936	31.5623	3964.83	12.0237	13.5267	95.4384	7.51483	6.01187	12.0237	247.989	3932.51	116.48	988.952	2490.42	359.96	21.793	792.063	57.1127	36.0712	13.5267	7915.37	12.7752	15.0297	63.1246	22328.1	33809.2	163.072	12.0237	33.8167	27.0534	312.617	88.675	514.014	257.759	18.0356	575.636	102.953	717.666	11.2722
0023 A baseline	23	local		3.19364	393.456	21.078	478.407	19.1618	110.5	1808.88	42.156	152.656	3675.87	9.58091	2729.92	831.623	6.38727	6.38727	23.6329	552.499	5613.77	589.545	3192.36	372.378	187.147	15.3295	616.372	218.445	258.046	11.4971	5268.22	8.30345	17.2456	910.825	17810.9	3071.64	940.206	15.3295	245.271	33.8525	251.02	236.329	454.135	353.216	141.159	3639.47	856.533	1640.89	17.8844
0023 B baseline	23	distant		7.73556	546.131	37.1307	787.48	30.9422	106.751	877.213	41.772	261.462	3550.62	18.5653	2566.66	1062.87	6.18845	10.8298	15.4711	416.173	8179.58	634.316	2359.35	355.836	184.106	120.675	662.164	134.599	205.766	7.73556	5520.1	35.5836	10.8298	1367.65	4073.55	1613.64	1302.67	7.73556	293.951	49.5076	235.161	228.973	499.717	295.498	134.599	4486.63	612.656	1609	20.1125
0024 B baseline	24	distant		19.3723	6480.79	58.117	254.821	13.4116	84.9402	1272.61	102.822	99.842	2789.61	28.3134	74.5089	831.52	5.96072	2.98036	22.3527	505.171	3421.45	630.346	2451.34	1962.57	265.252	278.663	329.33	379.996	162.429	19.3723	11963.2	52.1563	4.47054	1066.97	613.954	2624.2	928.381	5.96072	257.801	50.6661	208.625	262.271	502.19	345.721	126.665	1584.06	573.719	1810.57	26.8232
0025 A baseline	25	local		10.2353	61.4117	42.647	387.235	6.82352	66.5293	1515.67	130.5	29	1363	318.999	25.5882	299.382	12.7941	7.67646	36.6764	452.058	3845.05	755.705	4057.43	5420.43	452.058	39.2352	393.205	718.175	130.5	19.6176	16156.4	69.9411	23.8823	200.441	27544	13869.7	4951.32	15.3529	208.117	31.5588	272.088	266.97	311.323	596.205	179.117	2792.52	3861.26	1580.5	21.3235
0025 B baseline	25	distant		18.7324	3610.24	30.653	127.721	23.8412	163.483	1069.45	112.394	1168.22	2094.62	83.4443	3.40589	3441.65	1.70294	13.6236	15.3265	831.037	11202	1728.49	8734.4	1003.03	224.789	280.986	507.478	900.858	287.798	11.9206	6772.61	134.533	6.81178	4323.78	49.3854	3462.09	1282.32	8.51472	987.708	74.9296	219.68	596.031	539.834	320.154	483.636	7818.22	2814.97	2777.5	23.8412
29 site a bl	29	local		28439.1	3136.38	62.0343	18.2454	18.2454	425.118	1227.91	49.2626	313.821	2220.46	58.3853	315.645	248.137	36.4908	21.8945	36.4908	251.786	1820.89	609.396	3165.58	2023.41	218.945	149.612	560.134	41667	63.8589	23.719	7984.18	25.5436	16.4209	377.68	10991	3353.5	474.38	27.3681	200.699	29.1926	461.608	1027.22	226.243	1466.93	166.033	1372.05	673.255	2293.45	16.4209
29 site b bl	29	distant		41.5875	697.745	143.246	23.1041	27.725	101.658	2412.07	124.762	55.45	3525.69	161.729	23.1041	124.762	277.25	32.3458	41.5875	716.229	1377.01	1806.74	13377.3	8821.16	434.358	55.45	596.087	221.8	124.762	27.725	9006	60.0708	69.3124	457.462	160038	21422.2	734.712	41.5875	443.6	41.5875	277.25	212.558	300.354	4491.45	438.979	11173.2	489.808	1917.64	596.087
33 site a bl	33	local		5.99892	87.2571	18.5421	1081.44	14.1793	46.9007	2674.43	231.231	17.9968	3524.1	11.9978	324.487	269.952	24.5411	4.36285	2.18143	1045.99	1205.24	238.866	3363.21	550.81	247.047	10.9071	577.533	929.288	58.3532	11.4525	10237.4	10.3618	15.8153	96.5281	30462	23374.5	1749.5	17.9968	96.5281	14.7246	196.328	238.321	199.601	419.925	65.9882	3677.34	1241.78	1048.72	13.0886
33 site b bl	33	distant		5.65465	89.6666	12.1171	1479.1	7.27027	20.1952	1992.05	16.964	12.1171	1919.35	8.07807	15.3483	15.3483	4.03904	7.27027	9.69369	605.856	741.567	51.6997	354.627	137.327	180.141	7.27027	643.015	211.646	12.1171	10.5015	9970.77	4.84684	19.3874	20.1952	7664.48	32036.8	102.592	9.69369	21.003	9.69369	290.811	97.7447	201.952	150.252	9.69369	444.294	146.213	695.522	12.9249
[truncated: 684 more columns]
