# Supplementary material for: Tilsotolimod with Ipilimumab Drives Tumor Responses in Anti–PD-1 Refractory Melanoma
Source: Oxford University Press journal article supplement (doi:10.1158/2159-8290.cd-20-1546), 2021-03-11
Supplement: cd-20-1546_table_s6_suppst6.xlsx [file cd-20-1546_table_s6_suppst6.xlsx]

## Sheet: CD-20-1546R1_Table_S6
Table S6. Normalized gene expression at C3W8 (Week 8 following initial treatment)
Raw ID	Patient ID	Lesion
			C4BPA-mRNA	C7-mRNA	CASP10-mRNA	PBK-mRNA	CCL25-mRNA	CD1D-mRNA	TFRC-mRNA	FPR2-mRNA	CD24-mRNA	TNFRSF14-mRNA	DDX43-mRNA	IL13RA2-mRNA	IL7R-mRNA	IL1A-mRNA	IL5-mRNA	GAGE1-mRNA	IKBKE-mRNA	ETS1-mRNA	INPP5D-mRNA	CD53-mRNA	CD9-mRNA	TICAM2-mRNA	FCER1A-mRNA	PIN1-mRNA	C4B-mRNA	TNFRSF18-mRNA	KIR3DL1-mRNA	ITGB1-mRNA	CTSG-mRNA	IL17F-mRNA	LTB-mRNA	SPP1-mRNA	LGALS3-mRNA	GZMB-mRNA	CCL28-mRNA	CARD11-mRNA	ATM-mRNA	ELK1-mRNA	RORA-mRNA	IRAK4-mRNA	CXCL16-mRNA	SPN-mRNA	CXCR4-mRNA	PRF1-mRNA	JAK1-mRNA	CCL26-mRNA	DDX58-mRNA
C3W8_B_002_4mg	2	distant	2.01826	3.34019	4.82562	6.78645	2.18819	3.77315	9.64944	5.12679	3.01826	9.94604	3.4777	4.41058	9.81024	4.22772	2.60323	2.82562	7.31747	12.0924	7.92816	10.5838	9.89861	9.08973	4.41058	8.3266	4.87625	5.22772	3.01826	12.5329	3.77315	3.01826	6.05169	14.5935	11.9584	6.70477	3.18819	6.14755	3.54183	8.1294	8.41273	7.22284	9.01967	4.34019	10.1176	6.12679	9.74704	8.53396	7.52606
C3W8_B_003_4mg	3	distant	2.54451	13.0675	5.51852	3.82462	3.82462	6.40958	10.3202	5.09471	9.88182	11.0953	4.90708	3.05908	9.227	4.26072	3.05908	3.05908	9.6106	11.1295	9.69135	12.2905	10.9762	7.52506	7.48535	8.37015	10.1561	7.41664	3.19659	11.5982	7.78701	3.90708	11.7205	13.1036	13.4775	10.1718	3.19659	9.58421	6.22901	6.73716	8.27632	7.80325	10.228	8.53157	11.5932	9.09251	10.8613	6.92698	7.93191
C3W8_A_002_4mg	2	local	1.65808	5.18164	5.11751	7.90601	4.24304	6.01563	9.08015	7.54072	6.14993	9.42627	4.11751	10.6123	9.92954	3.65808	3.46544	3.82801	7.77702	11.9607	8.61808	11.4814	11.2983	8.64677	5.30194	8.50983	6.11751	5.98001	3.82801	12.9746	4.24304	4.46544	7.56497	16.1667	12.8769	9.80529	3.82801	6.99793	4.46544	7.85775	8.59472	7.46544	9.10929	6.0504	10.6482	9.07171	9.70793	6.51606	7.79763
C3W8_A_004_8mg	4	local	4.46149	9.91435	6.53188	5.94692	5.94692	6.13956	8.70942	6.46149	9.66313	10.0344	5.30949	5.46149	8.66313	4.13956	3.72453	4.46149	7.89445	10.9819	9.50589	11.4017	10.6592	8.13956	8.72453	8.53188	7.89445	6.84	3.72453	12.148	7.49712	5.13956	8.22703	7.86748	13.3934	7.97245	6.99754	8.54895	4.94692	6.89445	8.88103	7.66313	9.72453	6.53188	11.5254	9.63941	10.7395	6.46149	8.13956
C3W8_A_006_8mg	6	local	2.3414	5.35521	4.13281	7.9007	2.88889	4.13281	9.88532	5.3414	6.38915	11.8263	3.68535	5.82087	5.93558	1.96289	0.962888	1.22592	6.86013	11.2859	7.32395	10.062	9.68945	6.81088	2.64096	8.47385	6.11669	4.47385	4.03328	13.6106	3.39585	3.3414	5.28482	14.086	10.8209	9.90305	2.81088	4.72842	3.39585	7.58054	7.26667	6.82087	7.99851	4.54785	10.0593	9.28391	7.90305	2.96289	7.98969
C3W8_B_009_8mg	9	distant	2.35548	4.35548	3.41437	7.82851	2.57787	4.35548	11.158	5.30967	3.72471	9.88165	7.18414	2.22995	4.8998	1.77051	2.09244	5.55187	7.50183	10.6262	6.92533	9.85864	10.1878	6.39257	3.57787	8.04896	6.17139	5.3251	3.22995	12.1097	2.6774	3.29408	5.70125	13.7037	12.9414	8.64088	3.01844	5.3251	3.94044	7.84465	5.6774	6.78732	7.8366	4.94044	9.85599	7.93793	8.83929	3.97997	6.04664
C3W8_A_010_16mg	10	local	3.26545	6.82616	7.09326	6.52848	5.89771	6.58737	10.3885	6.49811	8.3444	10.6318	6.67144	4.40295	8.94352	4.26545	4.26545	6.33583	9.22892	11.8223	10.1675	12.5062	10.7685	8.18192	6.0728	8.22892	8.52095	7.35291	5.03098	12.2121	6.30107	4.26545	9.61594	11.405	13.3147	9.54343	4.11344	8.96589	5.52848	7.67144	8.20091	8.55085	10.1938	7.87425	11.7051	10.9519	10.7999	5.03098	8.78272
C3W8_B_010_16mg	10	distant	0.666327	4.05864	4.52431	7.21707	1.66633	5.29568	9.80332	5.42121	4.28104	11.085	5.00618	9.50396	6.52431	1.47368	1.98826	3.47368	8.10096	10.8033	7.67755	10.344	9.45423	6.57922	4.25129	8.30476	7.04571	6.24376	2.12576	11.6477	4.83625	2.12576	7.24376	11.6227	12.6053	8.93194	2.57322	6.89515	4.47368	6.98826	7.30295	7.90473	8.01284	6.07572	9.9575	9.90413	9.8512	2.66633	7.78786
C3W8_B_006_8mg	6	distant	2.27333	8.76874	4.27333	7.46096	3.27333	4.42533	9.91799	3.74726	6.99822	11.394	3.62697	6.48711	7.52967	2.42533	2.27333	3.35133	6.91076	10.9703	7.8415	10.3525	10.7323	7.13131	4.85829	8.67136	7.71811	5.1034	3.27333	13.5878	4.65799	2.80384	6.96759	14.2412	11.5922	7.62304	2.91076	5.5128	3.49572	7.50001	7.04004	7.26831	8.61713	4.96139	10.9458	8.123	8.85829	2.80384	7.59124
C3W8_A_008_8mg	8	local	3.7446	12.0908	5.1467	6.36351	5.10717	6.84413	9.84714	5.7186	10.0074	10.354	5.69213	3.25917	10.4221	3.5222	2.5222	3.7446	9.39872	12.9862	10.5972	12.762	9.31011	7.82599	7.98709	8.53343	8.77645	7.49183	4.10717	12.0917	6.08699	3.5222	11.6846	8.08699	11.7697	8.79522	3.63768	10.1097	5.81988	7.13691	8.65834	8.66516	8.5033	8.11715	12.3104	10.4637	11.1976	4.10717	9.12212
C3W8_B_008_8mg	8	distant	3.89245	10.9445	5.57052	5.92807	4.57052	7.26401	10.3682	5.45316	8.93246	10.6346	5.35188	2.37787	10.853	3.47741	3.02995	3.27096	9.28477	13.0451	10.5998	12.8121	10.6699	7.93246	7.73039	8.3875	8.21798	6.75043	3.81845	12.0711	6.25702	3.37787	11.1843	8.03813	12.7726	8.98626	3.15548	9.06637	5.72027	7.05434	8.80414	8.65533	9.45316	8.38109	12.424	10.9187	11.0176	4.15548	8.68946
C3W8_A_009_8mg	9	local	2.98471	5.13155	5.42528	8.06913	1.76231	4.87779	11.3441	5.48113	4.30663	9.60047	7.05387	1.49928	8.08424	1.98471	1.76231	3.49928	8.16034	10.9074	8.62236	10.8049	10.3789	7.8284	4.63678	8.3647	7.64496	5.5349	4.03533	12.2855	3.49928	2.98471	7.3271	8.7281	12.6024	9.11986	2.87779	6.43474	4.49928	7.6692	7.36223	7.51274	8.8194	5.93224	9.93641	8.8621	9.80123	2.49928	7.54804
C3W8_A_012_16mg	12	local	1.71267	6.1938	5.0346	6.6355	3.71267	5.21517	8.98569	4.37564	4.44964	12.7502	3.12771	7.84195	6.21517	3.71267	2.93506	3.93506	7.81421	10.3113	7.56234	9.36611	9.88593	7.55397	3.29763	8.30762	9.65714	5.82815	3.44964	10.7433	3.82815	3.29763	7.37564	14.4558	12.8366	6.37564	3.44964	6.25699	4.82815	7.81421	8.231	8.59531	7.60344	5.0819	9.14452	7.55397	10.1178	3.44964	7.26726
C3W8_B_012_16mg	12	distant	2.55792	5.86778	4.49652	7.92133	2.97296	5.03905	10.1982	4.99533	5.65946	12.2091	3.06042	9.80109	7.76412	3.29489	2.29489	2.29489	7.0867	11.2298	7.83405	10.2841	11.0323	7.76737	3.49652	8.7787	6.8556	4.80585	3.6734	11.9092	3.87985	3.92715	7.12778	15.1127	13.5395	7.91254	4.10224	5.76737	4.01735	7.84332	8.65244	7.98698	8.42417	5.12271	11.9443	7.71105	10.2256	5.12271	6.55039
C3W8_A_023_8mg	23	local	1.39384	11.7594	6.46708	6.45273	4.0568	6.65436	10.1861	5.64176	6.86415	10.9439	3.39384	4.85327	10.5795	4.0568	2.1308	3.89634	9.613	11.8371	9.86008	12.1648	10.5128	7.88033	5.30073	8.18825	8.46351	7.87496	3.2683	12.278	6.03769	2.61623	10.6465	12.7227	11.9732	9.3226	3.80887	9.64334	5.76307	7.32457	8.60004	8.9174	10.0966	8.47776	11.7429	10.0049	11.0574	6.28461	8.93299
C3W8_B_023_8mg	23	distant	3.20638	11.6862	5.56002	7.14498	3.49589	6.72296	10.2422	4.62142	9.74381	10.4721	4.03646	2.62142	10.2398	3.49589	2.62142	3.84381	9.45431	12.5836	10.448	12.6704	10.3334	7.54425	6.34024	8.05326	8.90682	7.56784	3.35838	11.8859	5.03646	2.84381	11.4218	9.3009	11.9812	8.61766	2.62142	9.79134	5.39401	7.12392	8.17088	8.80794	9.45852	7.85024	11.9153	9.79801	11.2701	3.35838	8.72994
C3W8_A_015_32mg	15	local	4.47866	11.8136	4.10669	7.16898	3.60419	7.2384	10.349	6.22868	9.0499	10.6275	4.26716	4.18915	11.9212	4.60419	3.82658	6.58908	9.41583	12.9205	10.8136	12.9156	9.0554	7.29535	7.1791	8.28132	8.91405	8.0416	3.60419	12.0904	5.94997	3.47866	12.1143	9.37898	11.0444	11.1709	3.71967	10.1459	6.0416	7.2189	8.49901	8.63025	8.01358	8.40725	12.7868	10.1225	11.1278	3.92612	8.73003
C3W8_B_015_32mg	15	distant	4.90593	9.35879	6.33889	7.25642	4.39135	6.10756	10.4357	5.90593	8.07585	10.6715	5.04343	3.16896	10.0475	5.39135	4.39135	4.16896	9.41689	12.0577	10.1309	12.7299	12.005	7.88778	6.71328	8.53819	9.20605	8.50286	4.584	12.5331	6.10756	5.16896	10.9849	15.5988	13.2784	9.09179	5.39135	10.0434	5.16896	7.44198	8.39135	8.16896	10.2386	8.21335	12.8355	10.0918	11.1671	4.39135	9.14624
C3W8_A_016_32mg	16	local	3.59172	12.3463	6.21621	6.90158	4.91365	6.67918	8.96965	6.65061	7.07285	10.0634	5.39908	3.00676	8.74485	4.32869	3.32869	4.00676	7.9783	11.8169	10.1283	12.5121	10.9617	8.26415	8.58796	8.31054	8.90158	6.60667	4.32869	13.223	6.92562	3.17668	9.17167	9.24755	13.3042	9.02078	3.46619	8.05115	5.21621	7.47436	8.09422	8.47436	9.70546	6.60667	12.2055	9.3883	10.5244	4.91365	8.80117
C3W8_B_016_32mg	16	distant	3.39712	9.92655	5.35132	8.94402	3.56705	7.23001	10.8442	7.40835	7.63553	10.4497	4.48459	9.62594	10.316	4.09756	4.20448	5.52641	8.18503	11.825	9.67789	12.1208	10.997	8.09061	8.13859	8.55194	8.38012	7.30401	4.20448	13.0453	6.01183	3.71905	10.0819	13.1842	13.2557	9.84833	4.20448	7.91282	4.64505	7.48459	7.5968	8.46321	9.15867	6.90492	11.8395	9.39994	10.4278	5.30401	8.06955
C3W8_B_024_8mg	24	distant	1.98204	9.16394	3.46747	7.98654	4.11954	5.18367	10.8665	6.54275	6.68248	11.2623	2.98204	3.11954	7.48666	-0.33989	2.66011	3.36055	8.63739	11.3308	8.36055	10.969	9.3431	7.08638	4.51809	7.84993	7.93623	6.68248	2.46747	12.1672	2.83004	2.98204	8.46424	12.3172	10.5359	11.0811	2.24507	7.11954	4.11954	7.16791	6.84993	7.63739	7.95473	6.59085	10.515	10.2002	9.79582	3.46747	7.44147
C3W8_A_025_8mg	25	local	4.10611	5.27604	5.35404	7.31557	5.013	6.77854	11.1229	8.82036	7.74997	10.524	6.27604	2.69108	9.46806	4.42804	3.91347	3.91347	9.36821	12.259	10.594	12.968	8.8743	8.50699	5.96409	8.49843	6.42804	8.12848	4.27604	12.524	4.10611	4.69108	10.437	15.1151	12.1388	11.1382	4.27604	9.11174	5.35404	7.35404	7.82036	8.7996	10.0805	7.62968	12.3505	11.0472	10.7482	4.42804	8.77145
C3W8_B_025_8mg	25	distant	3.50274	13.2176	6.1657	6.56163	4.50274	6.37721	9.51769	7.31009	9.65248	10.5508	5.0877	3.50274	9.07765	4.2397	1.91777	3.50274	8.89505	11.8691	9.67266	11.8836	9.9234	7.89505	9.29281	8.00524	10.0367	7.2397	3.50274	12.4733	4.50274	1.91777	10.5214	4.50274	12.0509	8.1657	4.50274	9.71219	5.72513	7.0877	8.40963	8.34404	8.48763	7.87197	11.5634	10.0573	11.065	4.72513	8.87197
[truncated: 683 more columns]
